# Supplementary material for: Formation Thermodynamics of Carbamazepine with Benzamide, Para-Hydroxybenzamide and Isonicotinamide Cocrystals: Experimental and Theoretical Study
Source: MDPI journal article supplement (doi:10.3390/pharmaceutics14091881), 2022-09-06
Supplement: s1 [file s1]

# Supplementary Materials: Formation Thermodynamics of Carbamazepine with Benzamide, *para*-Hydroxybenzamide and Isonicotinamide Cocrystals: Experimental and Theoretical Study

Alex N. Manin, Denis E. Boycov, Olga R. Simonova, Tatyana V. Volkova, Andrei V. Churakov and German L. Perlovich

**Table S1.** Experimental values of solubility, solubility product ( $K_{sp}$ ) and free energy of formation ( $\Delta G_f^0$ ) of CBZ, coformers and cocrystals [CBZ + BZA], [CBZ + 4-OH-BZA], and [CBZ + INAM] in acetonitrile at 293.15 K, 298.15 K, 303.15 K, 308.15 K and 313.15 K.

|                |                                                                    | Temperature, K   |                  |                  |                  |                  |
|----------------|--------------------------------------------------------------------|------------------|------------------|------------------|------------------|------------------|
|                |                                                                    | 293.15           | 298.15           | 303.15           | 308.15           | 313.15           |
| CBZ            | $S^P_{CBZ} \cdot 10^1, \text{mol} \cdot \text{L}^{-1}$             | $1.48 \pm 0.04$  | $1.68 \pm 0.05$  | $1.95 \pm 0.05$  | $2.21 \pm 0.06$  | $2.45 \pm 0.06$  |
| BZA            | $S^P_{BZA} \cdot 10^1, \text{mol} \cdot \text{L}^{-1}$             | $3.92 \pm 0.03$  | $4.94 \pm 0.11$  | $6.19 \pm 0.14$  | $7.79 \pm 0.15$  | $10.20 \pm 0.17$ |
| 4-OH-BZA       | $S^P_{4\text{-OH-BZA}} \cdot 10^1, \text{mol} \cdot \text{L}^{-1}$ | $1.10 \pm 0.02$  | $1.26 \pm 0.03$  | $1.45 \pm 0.04$  | $1.69 \pm 0.05$  | $1.92 \pm 0.05$  |
| INAM           | $S^P_{INAM} \cdot 10^1, \text{mol} \cdot \text{L}^{-1}$            | $1.02 \pm 0.02$  | $1.27 \pm 0.03$  | $1.43 \pm 0.03$  | $1.80 \pm 0.03$  | $2.06 \pm 0.04$  |
| [CBZ+BZA]      | $S_{CC}^{\text{exp}} \cdot 10^1, \text{mol} \cdot \text{L}^{-1}$   | $0.99 \pm 0.05$  | $1.10 \pm 0.06$  | $1.20 \pm 0.05$  | $1.36 \pm 0.05$  | $1.45 \pm 0.06$  |
|                | $K_{sp} \cdot 10^2, (\text{mol} \cdot \text{L}^{-1})^2$            | $0.97 \pm 0.05$  | $1.22 \pm 0.05$  | $1.45 \pm 0.05$  | $1.85 \pm 0.06$  | $2.11 \pm 0.07$  |
|                | $\Delta G_f^0, \text{kJ} \cdot \text{mol}^{-1}$                    | $-4.36 \pm 0.33$ | $-4.75 \pm 0.34$ | $-5.34 \pm 0.42$ | $-5.72 \pm 0.45$ | $-6.44 \pm 0.48$ |
| [CBZ+4-OH-BZA] | $S_{CC}^{\text{exp}} \cdot 10^2, \text{mol} \cdot \text{L}^{-1}$   | $3.12 \pm 0.06$  | $3.77 \pm 0.08$  | $4.46 \pm 0.11$  | $5.34 \pm 0.13$  | $5.89 \pm 0.18$  |
|                | $K_{sp} \cdot 10^3, (\text{mol} \cdot \text{L}^{-1})^2$            | $0.97 \pm 0.04$  | $1.42 \pm 0.05$  | $1.99 \pm 0.10$  | $2.85 \pm 0.10$  | $3.47 \pm 0.12$  |
|                | $\Delta G_f^0, \text{kJ} \cdot \text{mol}^{-1}$                    | $-6.87 \pm 0.48$ | $-6.69 \pm 0.45$ | $-6.68 \pm 0.42$ | $-6.58 \pm 0.40$ | $-6.45 \pm 0.36$ |
| [CBZ+INAM]     | $S_{CC}^{\text{exp}} \cdot 10^1, \text{mol} \cdot \text{L}^{-1}$   | $0.86 \pm 0.06$  | $0.95 \pm 0.04$  | $1.04 \pm 0.03$  | $1.12 \pm 0.03$  | $1.23 \pm 0.04$  |
|                | $K_{sp} \cdot 10^2, (\text{mol} \cdot \text{L}^{-1})^2$            | $0.74 \pm 0.03$  | $0.90 \pm 0.04$  | $1.08 \pm 0.05$  | $1.25 \pm 0.05$  | $1.50 \pm 0.07$  |
|                | $\Delta G_f^0, \text{kJ} \cdot \text{mol}^{-1}$                    | $-1.74 \pm 0.13$ | $-2.13 \pm 0.14$ | $-2.40 \pm 0.16$ | $-2.98 \pm 0.16$ | $-3.16 \pm 0.21$ |

**Table S2.** Experimental values of [CBZ + CF] (1:1) cocrystal solubility product ( $K_{sp}$  in  $(\text{mol}\cdot\text{L}^{-1})^2$ ), intrinsic solubility ( $S^0(\text{CBZ})$  in  $\text{mol}\cdot\text{L}^{-1}$ ) of CBZ and ( $S^0(\text{CF})$  in  $\text{mol}\cdot\text{L}^{-1}$ ) coformer and Gibbs energy of cocrystal formation reaction (in  $\text{kJ}\cdot\text{mol}^{-1}$ ).

| N  | Coformer      | Solvent       | $\log(K_{sp})$ | $\log(S^0(\text{CBZ}))$ | $\log(S^0(\text{CF}))$ | $\Delta G_f^0$ | Ref <sup>a</sup> |
|----|---------------|---------------|----------------|-------------------------|------------------------|----------------|------------------|
| 1  | Cinnamic Acid | Water         | -5.9           | -3.2                    | -2.46                  | -1.42          | [1]              |
| 2  | Emodin        | Ethanol       | -4.28          | -0.97                   | -1.74                  | -8.91          | [2]              |
| 3  | Emodin        | 2-propanol    | -4.82          | -1.36                   | -1.68                  | -10.21         | [2]              |
| 4  | Emodin        | Ethyl acetate | -4.64          | -1.32                   | -1.43                  | -10.77         | [2]              |
| 5  | Emodin        | Acetone       | -4.07          | -1.27                   | -1.29                  | -8.58          | [2]              |
| 6  | Nicotinamide  | Ethyl acetate | -3.17          | -1.31                   | -0.96                  | -5.17          | [3]              |
| 7  | Saccharin     | 2-propanol    | -3.41          | -1.3                    | -0.8                   | -7.5           | [3]              |
| 8  | Saccharin     | Ethyl acetate | -2.6           | -1.31                   | -0.74                  | -3.13          | [3]              |
| 9  | Saccharin     | Ethanol       | -2.38          | -0.85                   | -0.62                  | -5.15          | [3]              |
| 10 | Saccharin     | Methanol      | -2.22          | -0.4                    | -0.46                  | -4.6           | [4]              |
| 11 | Nicotinamide  | 2-propanol    | -2.43          | -1.3                    | -0.2                   | -5.31          | [3]              |
| 12 | Paeonol       | 2-propanol    | -2.32          | -1.36                   | -0.12                  | -4.83          | [2]              |
| 13 | Glutaric acid | Ethyl acetate | -2.05          | -1.31                   | 0                      | -4.23          | [3]              |
| 14 | Nicotinamide  | Ethanol       | -1.66          | -0.85                   | 0.04                   | -4.82          | [3]              |
| 15 | Paeonol       | Ethanol       | -1.74          | -0.97                   | 0.08                   | -4.84          | [2]              |
| 16 | Paeonol       | Methanol      | -0.84          | -0.49                   | 0.22                   | -3.19          | [2]              |
| 17 | Glutaric acid | Ethanol       | -1.03          | -0.85                   | 0.45                   | -3.54          | [3]              |
| 18 | Glutaric acid | 2-propanol    | -1.31          | -1.3                    | 0.56                   | -3.23          | [3]              |

**Table S3.** Some characteristics of cocrystals studied for estimation of formation thermodynamics <sup>a</sup>.

| N  | API | Coformer (CF) | Stoich | $T_m(\text{API})$<br>[°C] | $T_m(\text{CF})$<br>[°C] | $T_m(\text{CC})$<br>[°C] | $\Delta G_{sub}^{0,298}(\text{API})$<br>[kJ·mol <sup>-1</sup> ] | $\Delta H_{sub}^{0,298}(\text{API})$<br>[kJ·mol <sup>-1</sup> ] | $\Delta G_{sub}^{0,298}(\text{CF})$<br>[kJ·mol <sup>-1</sup> ] | $\Delta H_{sub}^{0,298}(\text{CF})$<br>[kJ·mol <sup>-1</sup> ] |
|----|-----|---------------|--------|---------------------------|--------------------------|--------------------------|-----------------------------------------------------------------|-----------------------------------------------------------------|----------------------------------------------------------------|----------------------------------------------------------------|
| 1  | CBZ | BZA           | 1:1    | 156.0                     | 127.0                    | 155.3                    | 58.5                                                            | 114.20                                                          | 41.6                                                           | 96.9                                                           |
| 2  | CBZ | 4-OH-BZA      | 1:1    | 156.0                     | 159.9                    | 172.2                    | 58.5                                                            | 114.20                                                          | 58.9                                                           | 117.8                                                          |
| 3  | CBZ | INAM          | 1:1    | 156.0                     | 161.0                    | 154.8                    | 58.5                                                            | 114.20                                                          | 49.1                                                           | 117.0                                                          |
| 19 | CBZ | Saccharin     | 1:1    | 156.0                     | 227.9                    | 176.0                    | 58.5                                                            | 114.20                                                          | 60.5                                                           | 130.2                                                          |

<sup>a</sup>  $T_m(\text{API})$ ,  $T_m(\text{CF})$ ,  $T_m(\text{CC})$  are the melting temperatures of the Active Pharmaceutical Ingredient, Coformer and Cocrystal, respectively;  $\Delta G_{sub}^{0,298}(\text{API})$ ,  $\Delta H_{sub}^{0,298}(\text{API})$ ,  $\Delta G_{sub}^{0,298}(\text{CF})$ ,  $\Delta H_{sub}^{0,298}(\text{CF})$  are the sublimation Gibbs energies and enthalpies of the Active Pharmaceutical Ingredient and Coformer.

**Table S4.** Summary of the H-bond propensity calculation for the cocrystals, including types (A:A, A:B or B:B) of the bonds. The final column indicates if the interaction listed is observed in the crystal structure.

| [CBZ+BZA] (1:1) |       |          |            |      |   |
|-----------------|-------|----------|------------|------|---|
| Interaction     | Donor | Acceptor | Propensity | Type |   |
| 1               | N26   | O1       | 0.83       | B:A  | + |
| 2               | N26   | O27      | 0.75       | B:B  | + |
| 3               | N18   | O1       | 0.65       | A:A  | + |
| 4               | N18   | O27      | 0.54       | A:B  | + |

Functional group definitions for the CBZ+BZA cocrystal system. The functional groups defined are carbamoyl\_2 (N26 and O27) and T3NH0\_amide (N18 and O1)

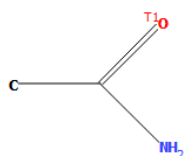

carbamoyl\_2

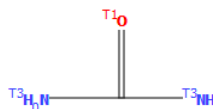

T3NH0\_amide

| [CBZ+4-OHBZA] (1:1) |       |          |            |      |   |
|---------------------|-------|----------|------------|------|---|
| Interaction         | Donor | Acceptor | Propensity | Type |   |
| 1                   | N26   | O1       | 0.80       | B:A  |   |
| 2                   | N26   | O27      | 0.73       | B:B  | + |
| 3                   | N18   | O1       | 0.60       | A:A  | + |
| 4                   | O28   | O1       | 0.53       | B:A  | + |
| 5                   | N18   | O27      | 0.52       | A:B  |   |
| 6                   | N26   | O28      | 0.47       | B:B  |   |
| 7                   | O28   | O27      | 0.44       | B:B  |   |
| 8                   | N18   | O28      | 0.26       | A:B  | + |
| 9                   | O28   | O28      | 0.21       | B:B  |   |

Functional group definitions for the [CBZ+4-OHBZA] cocrystal system. The functional groups defined are carbamoyl\_2 (N26 and O27), ar\_oh (O28) and T3NH0\_amide (N18 and O1)

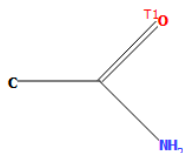

carbamoyl\_2

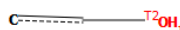

ar\_oh

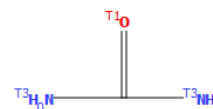

T3NH0\_amide

| [CBZ+INAM] (1:1) |       |          |            |      |   |
|------------------|-------|----------|------------|------|---|
| Interaction      | Donor | Acceptor | Propensity | Type |   |
| 1                | N27   | N22      | 0.79       | B:B  |   |
| 2                | N27   | O1       | 0.74       | B:A  | + |
| 3                | N18   | N22      | 0.71       | A:B  |   |
| 4                | N27   | O26      | 0.68       | B:B  | + |
| 5                | N18   | O1       | 0.64       | A:A  | + |
| 6                | N18   | O26      | 0.57       | A:B  | + |

Functional group definitions for the [CBZ+INAM] cocrystal system. The functional groups defined are carbamoyl\_2 (N27 and O26), aromatic\_nitrogen (N22) and T3NH0\_amide (N18 and O1)

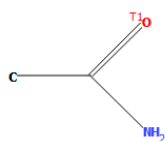

carbamoyl\_2

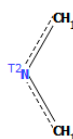

aromatic\_nitrogen

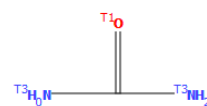

T3NH0\_amide

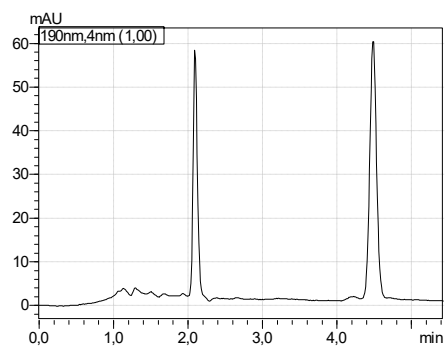

(a)

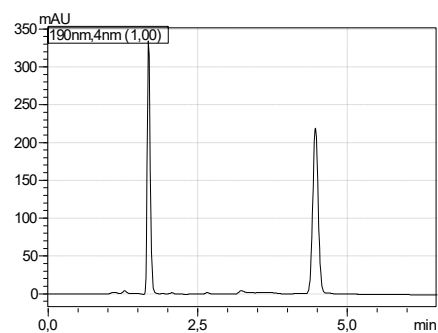

(b)

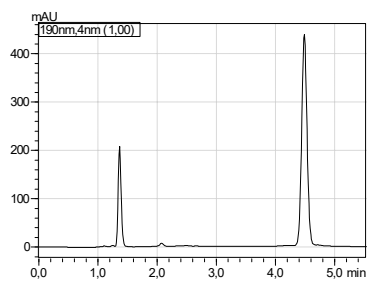

(c)

**Figure S1** Chromatograms of cocrystals obtained at 298.15 K. (a) [CBZ + BZA], (b) [CBZ + 4-OH-BZA], (c) [CBZ + INAM].

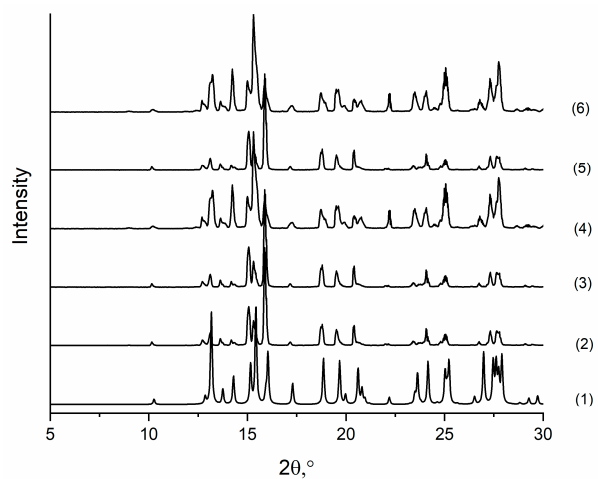

(a)

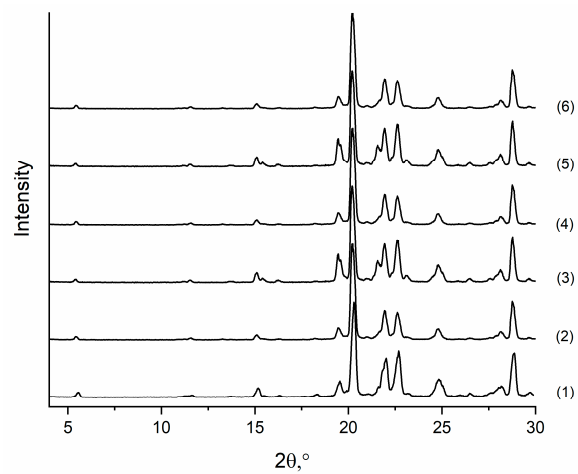

(b)

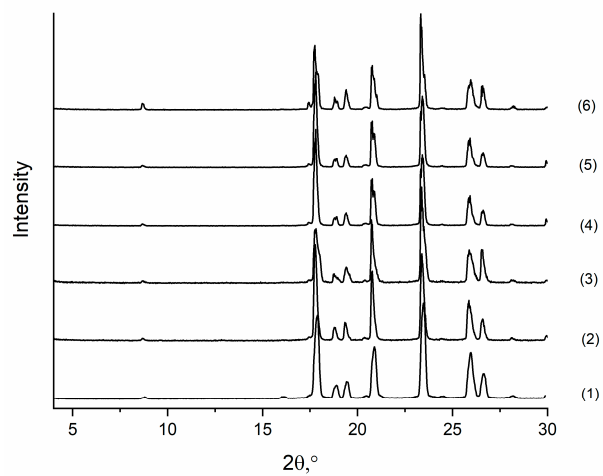

(c)

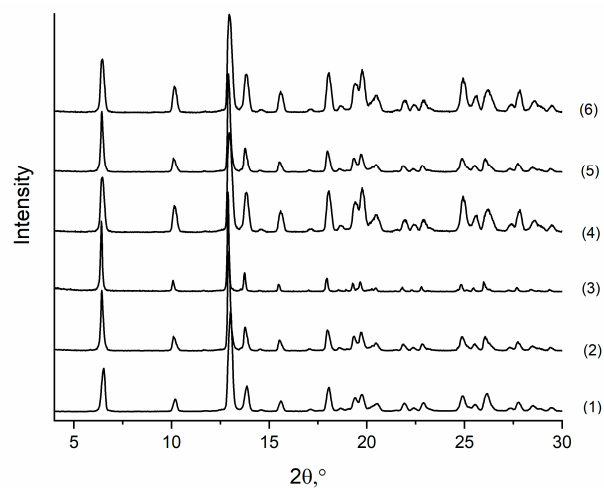

(d)

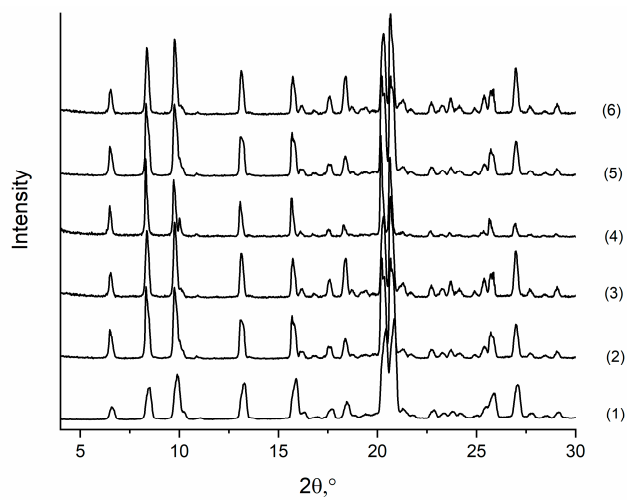

(e)

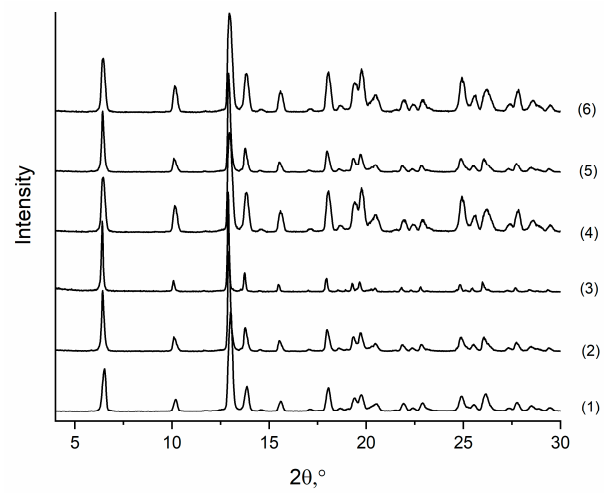

(f)

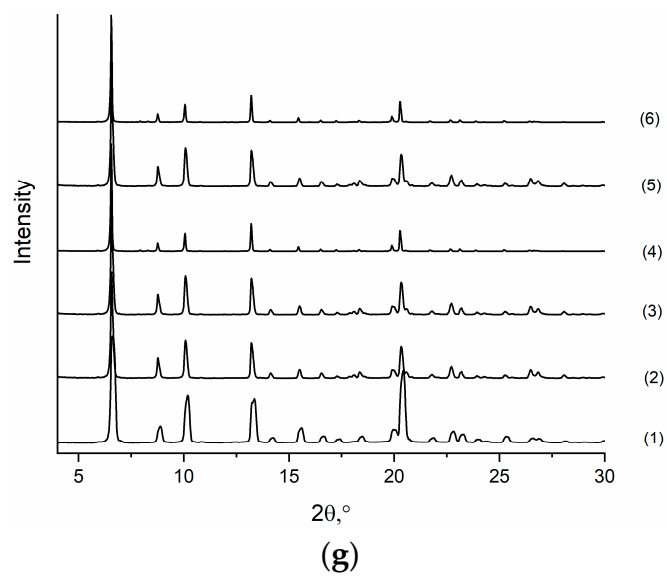

**Figure S2.** Comparison of experimental PXRD patterns of initial components and cocrystals with phases after experiment: (a) CBZ, (b) 4-OH-BZA, (c) INAM, (d) BZA, (e) [CBZ+4-OH-BZA] (1:1), (f) [CBZ+INAM] (1:1), (g) [CBZ+BZA] (1:1). (1) Initial phase, (2) 20 °C, (3) 25 °C, (4) 30 °C, (5) 35 °C, (6) 40 °C.

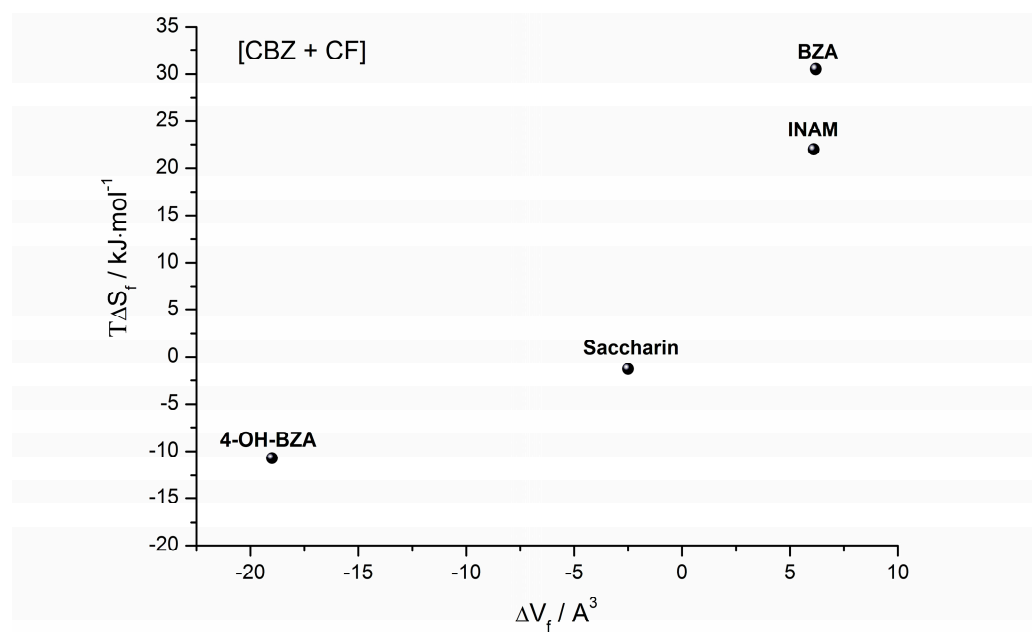

**Figure S3.** Dependence of  $T\Delta S_f^{298}(\text{exp})$  versus  $\Delta V_f(\text{CC})$  for cocrystals [CBZ + CF].

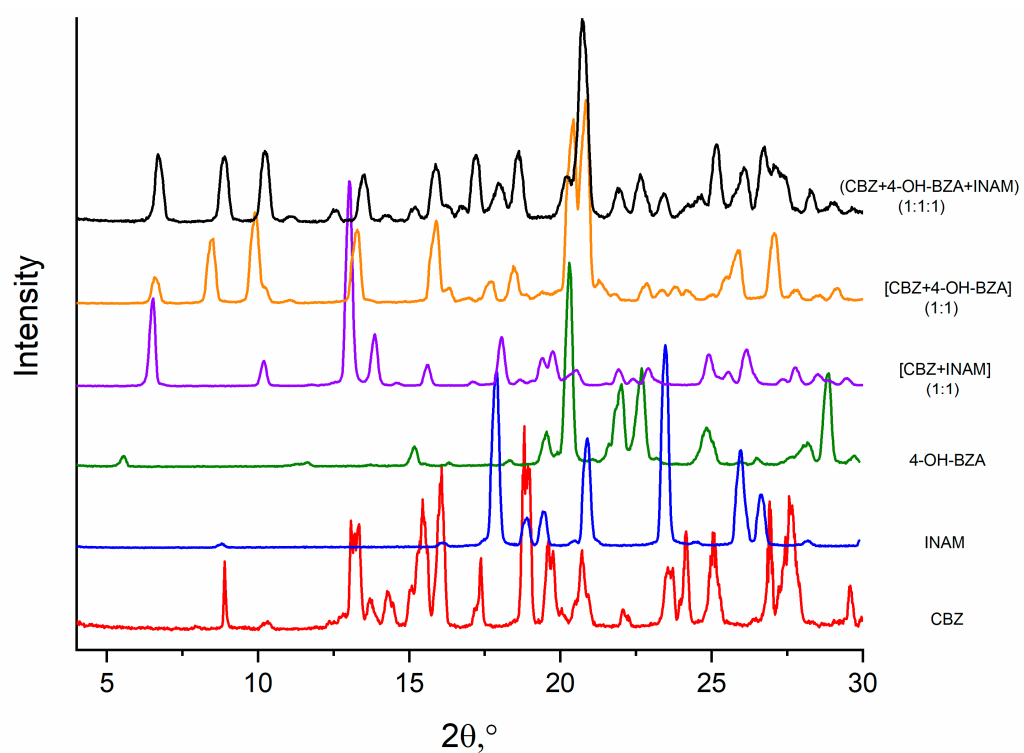

**Figure S4.** Comparison of the PXRD patterns: CBZ (red), INAM (blue), 4-OH-BZA (green), [CBZ+INAM] (1:1) (violet), [CBZ+4-OH-BZA] (1:1) (orange) and (CBZ+4-OH-BZA+INAM) (1:1:1) (black).

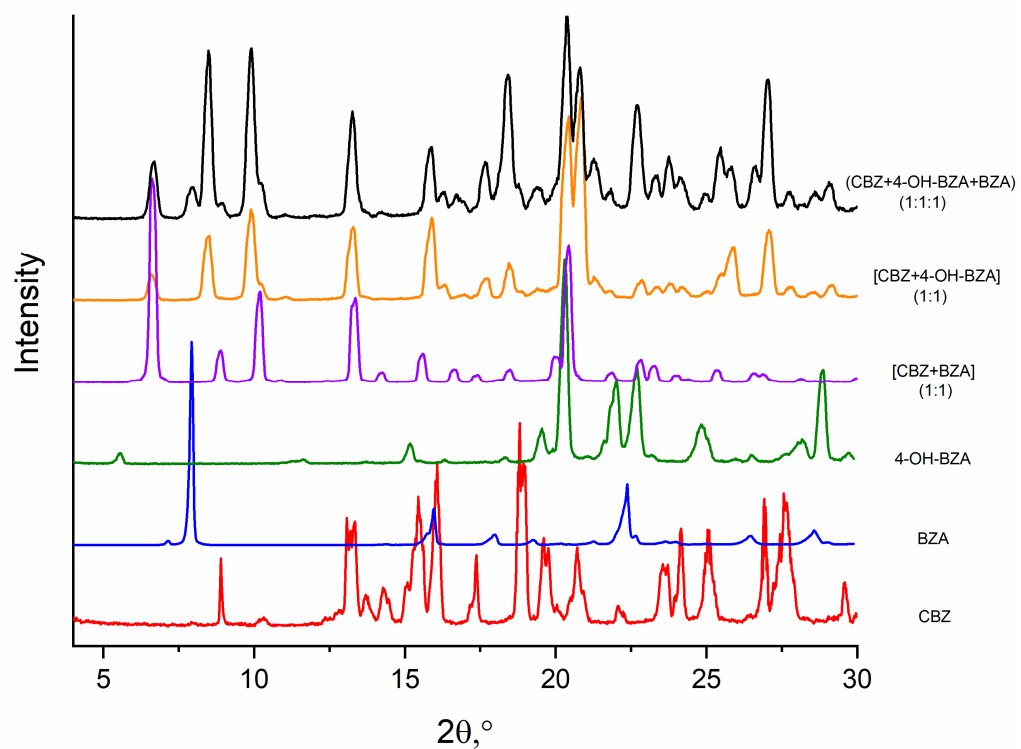

**Figure S5.** Comparison of the PXRD patterns: CBZ (red), BZA (blue), 4-OH-BZA (green), [CBZ+BZA] (1:1) (violet), [CBZ+4-OH-BZA] (1:1) (orange) and (CBZ+4-OH-BZA+BZA) (1:1:1) (black).

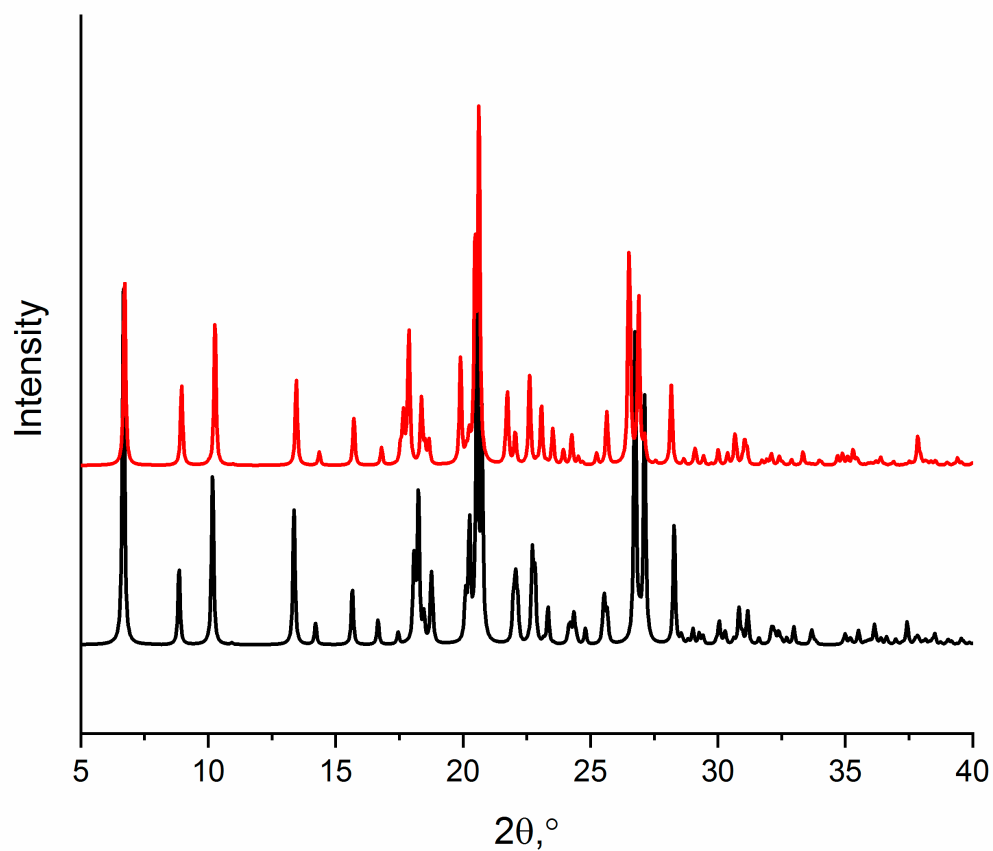

**Figure S6.** Comparison of the simulated PXRD patterns of [CBZ+BZA] (1:1) (black) and [CBZ+INAM] (1:1) form II (ref. LOFKIB01) (red).



## References

1. Shayanfar, A.; Asadpour-Zeynali, K.; Jouyban, A. Solubility and dissolution rate of a carbamazepine–cinnamic acid cocrystal. *J. Mol. Liq.* **2013**, *178*, 171–176. <https://doi.org/10.1016/j.molliq.2013.06.015>.
2. Huang, D.; Chan, H.C.S.; Wu, Y.; Li, L.; Zhang, L.; Lv, Y.; Yang, X.; Zhou, Z. Phase solubility investigation and theoretical calculations on drug-drug cocrystals of carbamazepine with Emodin, Paeonol. *J. Mol. Liq.* **2021**, *329*, 115604. <https://doi.org/10.1016/j.molliq.2021.115604>.
3. Good, D.J.; Rodríguez-Hornedo, N. Solubility advantage of pharmaceutical cocrystals. *Cryst. Growth Des.* **2009**, *9*, 2252–2264. <https://doi.org/10.1021/cg801039j>.
4. Oliveira, M.A.; Peterson, M.L.; Davey, R.J. *Cryst. Growth Des.* **2011**, *11*, 449–457. <https://doi.org/10.1021/cg101214m>.
